# Supplementary material for: Reverse PCA, a Systematic Approach for Identifying Genes Important for the Physical Interaction between Protein Pairs
Source: PLOS journal article supplement (doi:10.1371/journal.pgen.1003838), 2013-10-10
Supplement: S4 (10.1371/journal.pgen.1003838.s004) [file journal.pgen.1003838.s004]

**Table S1.** Genes Identified through Mutants that Affect the Physical Interaction Between *NHP6A::F[1,2]*; *HTB2::F[3]*

| Systematic Name                              | Standard Name | Description                                                                                                                                                                                                                                     |
|----------------------------------------------|---------------|-------------------------------------------------------------------------------------------------------------------------------------------------------------------------------------------------------------------------------------------------|
| <b>Chromatin remodeling</b>                  |               |                                                                                                                                                                                                                                                 |
| <i>YOL012C</i>                               | <i>HTZ1</i>   | Histone variant H2AZ, exchanged for histone H2A in nucleosomes by the SWR1 complex; involved in transcriptional regulation through prevention of the spread of silent heterochromatin                                                           |
| <i>YDR334W</i>                               | <i>SWR1</i>   | Swi2/Snf2-related ATPase that is the structural component of the SWR1 complex, which exchanges histone variant H2AZ (Htz1p) for chromatin-bound histone H2A                                                                                     |
| <i>YGR270W</i>                               | <i>YTA7</i>   | Protein that localizes to chromatin and has a role in regulation of histone gene expression; has a bromodomain-like region that interacts with the N-terminal tail of histone H3, and an ATPase domain; potentially phosphorylated by Cdc28p    |
| <b>Protein biosynthesis and modification</b> |               |                                                                                                                                                                                                                                                 |
| <i>YDL132W</i>                               | <i>CDC53</i>  | Cullin, structural protein of SCF complexes (which also contain Skp1p, Cdc34p, Hrt1p and an F-box protein) involved in ubiquitination; SCF promotes the G1-S transition by targeting G1 cyclins and the Cln-CDK inhibitor Sic1p for degradation |
| <i>YML092C</i>                               | <i>PRE8</i>   | Alpha 2 subunit of the 20S proteasome                                                                                                                                                                                                           |
| <i>YDR434W</i>                               | <i>GPII7</i>  | Transmembrane protein subunit of the glycosylphosphatidylinositol transamidase complex that adds GPIs to newly synthesized proteins                                                                                                             |
| <b>Transcription and RNA processing</b>      |               |                                                                                                                                                                                                                                                 |
| <i>YGR006W</i>                               | <i>PRP18</i>  | Splicing factor involved in the positioning of the 3' splice site during the second catalytic step of splicing, part of snRNP U5, interacts with Slu7p                                                                                          |
| <i>YPR178W</i>                               | <i>PRP4</i>   | Splicing factor, component of the U4/U6-U5 snRNP complex                                                                                                                                                                                        |
| <i>YHR085W</i>                               | <i>IPI1</i>   | Essential component of the Rix1 complex (with Rix1p and Ipi3p) that is required for processing of ITS2 sequences from 35S pre-rRNA; Rix1 complex associates with Mdn1p in pre-60S ribosomal particles                                           |
| <i>YDL098C</i>                               | <i>SNU23</i>  | Component of U4/U6.U5 snRNP involved in mRNA splicing via spliceosome                                                                                                                                                                           |
| <i>YOR194C</i>                               | <i>TOA1</i>   | TFIIA large subunit; involved in transcriptional activation, acts as antirepressor or as coactivator; homologous to largest and second largest subunits of human and Drosophila TFIIA                                                           |
| <b>DNA replication</b>                       |               |                                                                                                                                                                                                                                                 |
| <i>YOR060C</i>                               | <i>SLD7</i>   | Protein with a role in chromosomal DNA replication; interacts with Sld3p and reduces its affinity for Cdc45p; deletion mutant has aberrant mitochondria                                                                                         |
| <b>Transport and secretion</b>               |               |                                                                                                                                                                                                                                                 |
| <i>YOL130W</i>                               | <i>ALR1</i>   | Plasma membrane Mg(2+) transporter, expression and turnover are regulated by Mg(2+) concentration; overexpression confers increased tolerance to Al(3+) and Ga(3+) ions                                                                         |
| <i>YGR257C</i>                               | <i>MTM1</i>   | Mitochondrial protein of the mitochondrial carrier family, involved in activating mitochondrial Sod2p probably by facilitating insertion of an essential manganese cofactor                                                                     |
| <i>YDR246W</i>                               | <i>TRS23</i>  | One of 10 subunits of the transport protein particle (TRAPP) complex of the cis-Golgi which mediates vesicle docking and fusion; involved in endoplasmic reticulum (ER) to Golgi membrane traffic                                               |
| <i>YGR120C</i>                               | <i>COG2</i>   | Essential component of the conserved oligomeric Golgi complex (Cog1p through Cog8p), a cytosolic tethering complex that functions in protein trafficking to mediate fusion of transport vesicles to Golgi compartments                          |
| <i>YDL145C</i>                               | <i>COP1</i>   | Alpha subunit of COPI vesicle coatamer complex, which surrounds transport vesicles in the early secretory pathway                                                                                                                               |
| <i>YNL272C</i>                               | <i>SEC2</i>   | Guanyl-nucleotide exchange factor for the small G-protein Sec4p; essential for post-Golgi vesicle transport and for autophagy; associates with the exocyst, via exocyst subunit Sec15p, on secretory vesicles                                   |

|                |              |                                                                                                                                                                                                                                                                                                                    |
|----------------|--------------|--------------------------------------------------------------------------------------------------------------------------------------------------------------------------------------------------------------------------------------------------------------------------------------------------------------------|
| <i>YPR055W</i> | <i>SEC8</i>  | Essential 121 kDa subunit of the exocyst complex; the exocyst complex (Sec3p, Sec5p, Sec6p, Sec8p, Sec10p, Sec15p, Exo70p, and Exo84p) has the essential function of mediating polarized targeting of secretory vesicles to active sites of exocytosis; relocalizes away from bud neck upon DNA replication stress |
| <i>YNR026C</i> | <i>SEC12</i> | Guanine nucleotide exchange factor (GEF), activates Sar1p by catalyzing the exchange of GDP for GTP; required for the initiation of COPII vesicle formation in ER to Golgi transport; glycosylated integral membrane protein of the ER                                                                             |
| <i>YNL287W</i> | <i>SEC21</i> | Gamma subunit of coatomer, a heptameric protein complex that together with Arf1p forms the COPI coat; involved in ER to Golgi transport of selective cargo                                                                                                                                                         |
| <i>YGL137W</i> | <i>SEC27</i> | Essential beta'-coat protein of the COPI coatomer, involved in ER-to-Golgi and Golgi-to-ER transport                                                                                                                                                                                                               |
| <i>YLR440C</i> | <i>SEC39</i> | Component of the Dsl1p tethering complex that interacts with ER SNAREs Sec20p and Use1p; proposed to be involved in protein secretion; localizes to the ER and nuclear envelope                                                                                                                                    |
| <b>Unknown</b> |              |                                                                                                                                                                                                                                                                                                                    |
| <i>YMR134W</i> | <i>ERG29</i> | Protein of unknown function that may be involved in iron metabolism; mutant bm-8 has a growth defect on iron-limited medium that is complemented by overexpression of Yfh1p; shows localization to the ER; highly conserved in ascomycetes                                                                         |

Biologically relevant proteins with a score between 0.1 and 0.2

|                                         |              |                                                                                                                                                                                                                       |
|-----------------------------------------|--------------|-----------------------------------------------------------------------------------------------------------------------------------------------------------------------------------------------------------------------|
| <b>Chromatin remodeling</b>             |              |                                                                                                                                                                                                                       |
| <i>YML041C</i>                          | <i>VPS71</i> | Nucleosome-binding component of the SWR1 complex, which exchanges histone variant H2AZ (Htz1p) for chromatin-bound histone H2A; required for vacuolar protein sorting                                                 |
| <i>YDR485C</i>                          | <i>VPS72</i> | Htz1p-binding component of the SWR1 complex; exchanges histone variant H2AZ (Htz1p) for chromatin-bound histone H2A                                                                                                   |
| <i>YFR037C</i>                          | <i>RSC8</i>  | Component of the RSC chromatin remodeling complex; essential for viability and mitotic growth; homolog of SWI/SNF subunit Swi3p                                                                                       |
| <i>YML127W</i>                          | <i>RSC9</i>  | Component of the RSC chromatin remodeling complex; DNA-binding protein involved in the synthesis of rRNA and in transcriptional repression and activation of genes regulated by the Target of Rapamycin (TOR) pathway |
| <i>YLR182W</i>                          | <i>SWI6</i>  | Transcription cofactor; forms complexes with Swi4p and Mbp1p to regulate transcription at the G1/S transition; involved in meiotic gene expression                                                                    |
| <i>YPR034W</i>                          | <i>ARP7</i>  | Component of both the SWI/SNF and RSC chromatin remodeling complexes; actin-related protein involved in transcriptional regulation                                                                                    |
| <b>Transcription and RNA processing</b> |              |                                                                                                                                                                                                                       |
| <i>YBR193C</i>                          | <i>MED8</i>  | Subunit of the RNA polymerase II mediator complex; associates with core polymerase subunits to form the RNA polymerase II holoenzyme; essential for transcriptional regulation                                        |
| <i>YER022W</i>                          | <i>SRB4</i>  | Subunit of the RNA polymerase II mediator complex; associates with core polymerase subunits to form the RNA polymerase II holoenzyme; essential for transcriptional regulation                                        |
