# Supplementary material for: Reverse PCA, a Systematic Approach for Identifying Genes Important for the Physical Interaction between Protein Pairs
Source: PLoS Genet. 2013 Oct 10;9(10):e1003838. doi: 10.1371/journal.pgen.1003838 (PMC3794912; doi:10.1371/journal.pgen.1003838)
Supplement: Table S7 — List of false positives. (XLSX) [file pgen.1003838.s010.xlsx]

## Sheet: Sheet1
		screens
orf name	gene	YHR122W-MET18	HTB2-NHP6A	RPN5-RPN11	fused DHFR
YKL114C	APN1	V	V	V	V
YNL256W	FOL1	V	V		V
YBL026W	LSM2	V	V	V	V
YBR087W	RFC5		V	V	V
YBR109C	CMD1	V	V		V
YDL103C	QRI1	V	V		V
YDR228C	PCF11	V	V		V
YDR238C	SEC26	V	V	V
YER012W	PRE1	V	V		V
YFL017C	GNA1	V	V	V
YFL038C	YPT1	V	V	V	V
YGL130W	CEG1		V	V	V
YGR002C	SWC4	V	V	V
YGR091W	PRP31	V	V	V	V
YGR140W	CBF2	V	V		V
YHR058C	MED6	V	V		V
YLR033W	RSC58	V	V		V
YLR268W	SEC22		V	V	V
YLR298C	YHC1	V	V	V	V
YML130C	ERO1		V	V	V
YMR268C	PRP24	V		V	V
YNL152W	INN1	V	V		V
YOL094C	RFC4		V	V	V
YOL146W	PSF3	V	V		V
YOR181W	LAS17	V	V	V	V
YOR244W	ESA1	V		V	V
YPL209C	IPL1		V	V	V
